# Supplementary material for: Targeting metabolic vulnerability in mitochondria conquers MEK inhibitor resistance in KRAS-mutant lung cancer
Source: PubMed Central journal article supplement — Acta Pharm Sin B. 2022 Oct 28;13(3):1145–63. doi: 10.1016/j.apsb.2022.10.023 (PMC10031260; doi:10.1016/j.apsb.2022.10.023), 2022-10-28
Supplement: mmc1.pdf [file mmc1.pdf]

Supporting Information for

Original article

**Targeting metabolic vulnerability in mitochondria conquers MEK inhibitor resistance in *KRAS*-mutant lung cancer**

**Juanjuan Feng<sup>a,b,†</sup>, Zhengke Lian<sup>a,†</sup>, Xinting Xia<sup>a</sup>, Yue Lu<sup>a</sup>, Kewen Hu<sup>c</sup>, Yunpeng Zhang<sup>a</sup>, Yanan Liu<sup>a</sup>, Longmiao Hu<sup>a</sup>, Kun Yuan<sup>a</sup>, Zhenliang Sun<sup>b,\*</sup>, Xiufeng Pang<sup>a,\*</sup>**

<sup>a</sup>Shanghai Key Laboratory of Regulatory Biology, School of Life Sciences, East China Normal University, Shanghai 200241, China

<sup>b</sup>Joint Center for Translational Medicine, Southern Medical University Affiliated Fengxian Hospital, Shanghai 201499, China

<sup>c</sup>Cancer Institute, Fudan University Shanghai Cancer Center, Department of Oncology, Shanghai Medical College, Fudan University, Shanghai 200032, China

Received ; received in revised form; accepted

\*Corresponding authors. Tel.: +86 21 24206942, +86 21 [57416150](tel:+862157416150).

[E-mail addresses: xfpang@bio.ecnu.edu.cn \(Xiufeng Pang\), zhenliang@smu.edu.cn \(Zhenliang Sun\).](mailto:xfpang@bio.ecnu.edu.cn)

<sup>†</sup>These authors made equal contributions to this work.

**1. Supporting figures S1–S9**

**2. Supporting tables S1–S5**

## 1. Supporting figures

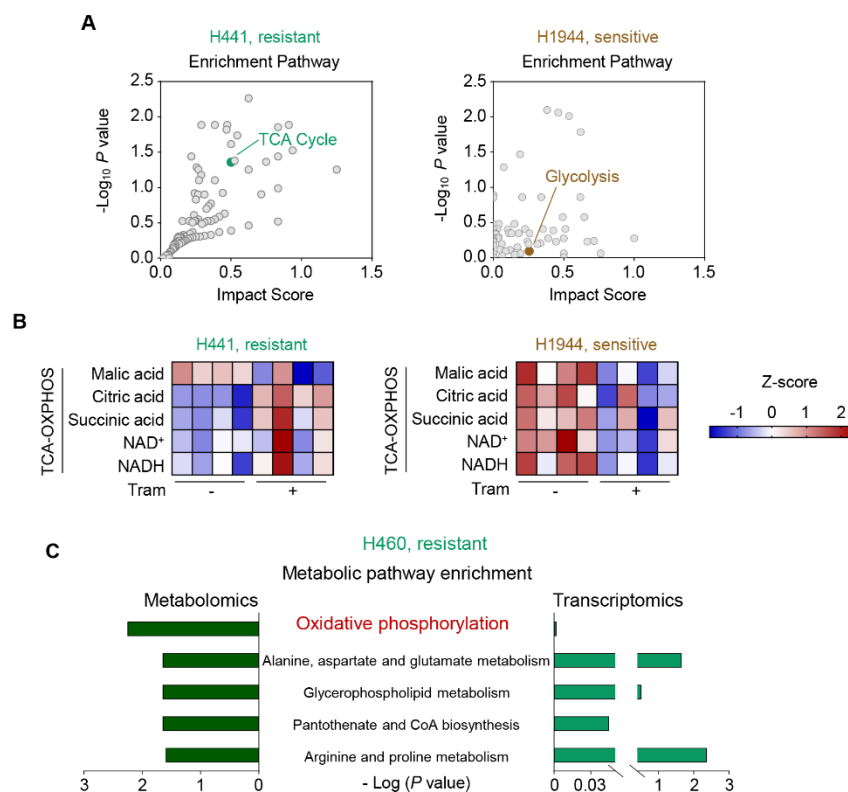

**Figure S1.** MEK inhibition activates mitochondrial oxidative metabolism. (A) Metabolites enrichment analysis. H441 and H1944 cells were treated with trametinib at their respective 1/2  $IC_{50}$  values for 24 h and then harvested for metabolomic profiling determination. Metabolite set enrichment analysis was performed to identify dysregulated metabolic pathways ( $n = 4$ ). (B) Abundance of major metabolites in the tricarboxylic acid (TCA)-oxidative phosphorylation (OXPHOS) pathway in trametinib-treated cells versus untreated cells. Metabolite abundance was normalized by cell number. NADH, nicotinamide adenine dinucleotide; NAD<sup>+</sup>, oxidized nicotinamide adenine dinucleotide. Values are scaled as indicated (2 to -1). (C) The top 5 altered metabolic pathways in trametinib-treated H460 cells as compared with untreated control. H460 cells were treated with trametinib at their respective 1/2  $IC_{50}$  for 24 h. Cells were then harvested and subjected to metabolomics ( $n = 6$ ) and RNA sequencing ( $n = 3$ ), respectively. The differential metabolites and genes enriched in KEGG biological pathway were analyzed.

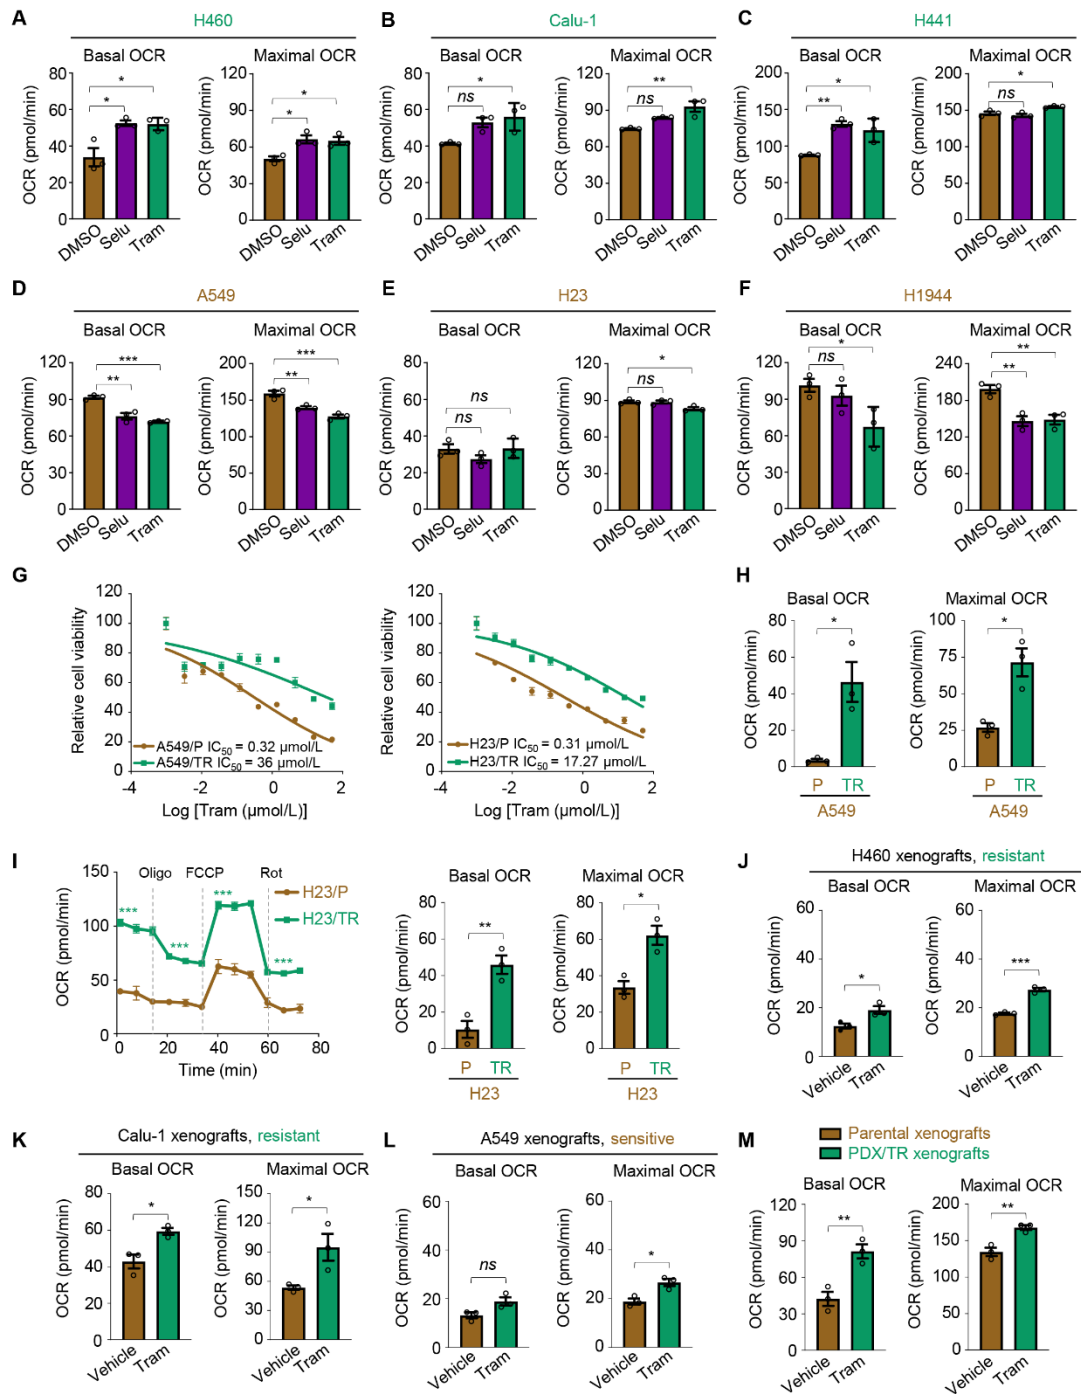

**Figure S2.** MEK inhibition favors oxidative energy metabolism in resistant cells and xenograft tumors. (A–F) The level of basal OCR and maximal OCR in NSCLC cells after MEK<sub>i</sub> treatment. MEK<sub>i</sub>-resistant cells (H460, Calu-1, and H441) (A–C) and MEK<sub>i</sub>-sensitive cells (A549, H23, and H1944) (D–F) were exposed to trametinib and selumetinib at their respective 1/2  $\text{IC}_{50}$  values for 6 h. Basal OCR and maximal OCR were interpolated from the time course plot. Data represent the mean  $\pm$  SEM of three technical replicates, representative of three independent experiments with similar results. \* $P < 0.05$ , \*\* $P < 0.01$ , and \*\*\* $P < 0.001$ ; *ns*, not significant, by one-way ANOVA

with Tukey's multiple-comparisons test. (G) Inhibitory effects of trametinib on acquired resistant cells (A549/TR or H23/TR) and their parental cells (A549/P or H23/P). Cells were treated with trametinib for 72 h, and cell viability was measured. Data represent the mean  $\pm$  SEM of three technical replicates, representative of three independent experiments with similar results. (H) Basal OCR and maximal OCR in A549/TR cells and A549/P cells. Data represent the mean  $\pm$  SEM of three technical replicates, representative of three independent experiments with similar results.  $*P < 0.05$ , by unpaired, two-sided Student's  $t$  test. (I) OCR in H23/TR cells and H23/P cells. A representative trace of OCR from a mitochondrial stress test is shown (*left*). Basal OCR and maximal OCR were calculated (*right*). Data represent the mean  $\pm$  SEM of three technical replicates, representative of three independent experiments with similar results.  $*P < 0.05$ ,  $**P < 0.01$ , and  $***P < 0.001$ , by unpaired, two-sided Student's  $t$  test. (J–L) Basal OCR and maximal OCR in trametinib-treated and vehicle-treated tumors. Values are expressed as the mean  $\pm$  SEM of three independent biological samples.  $*P < 0.05$ , and  $***P < 0.001$ ; *ns*, not significant, by unpaired, two-sided Student's  $t$  test. (M) Basal OCR and maximal OCR in PDX/TR and parental xenografts. Values are expressed as the mean  $\pm$  SEM of three independent biological samples.  $**P < 0.01$ , by unpaired, two-sided Student's  $t$  test.

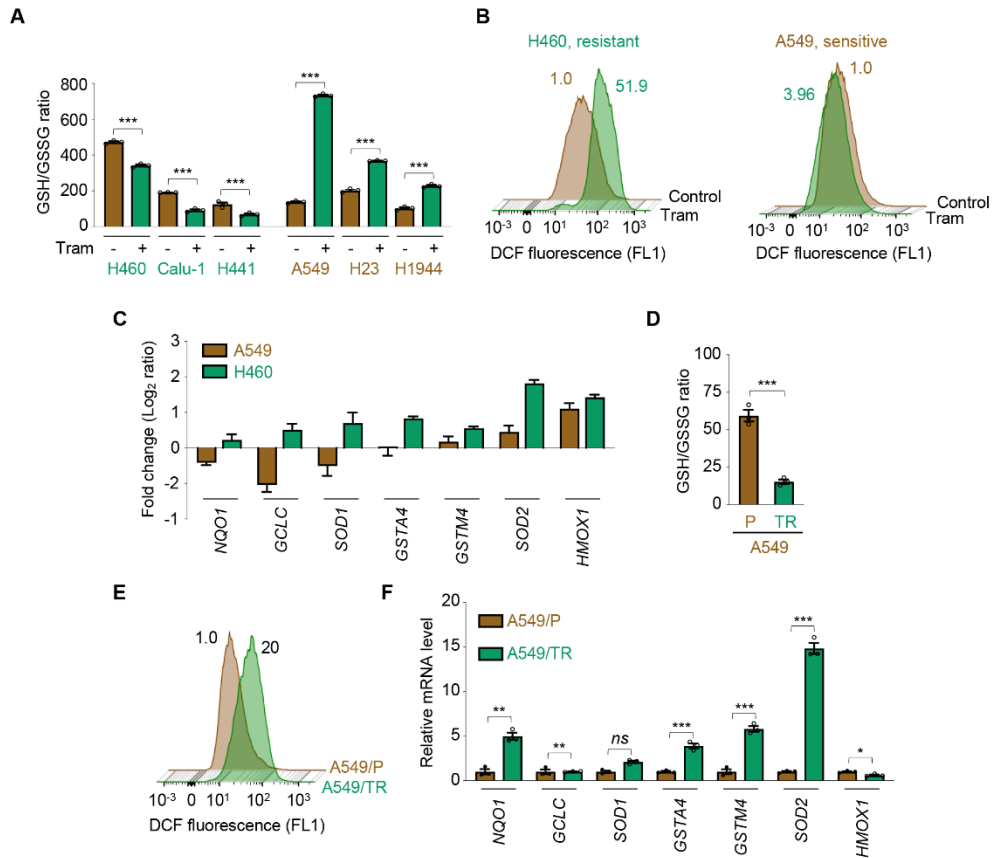

**Figure S3.** MEK inhibition increases redox stress in MEKi-resistant cells. (A) GSH/GSSG ratio in trametinib-treated NSCLC cells. MEKi-resistant cells (H460, Calu-1, and H441) and MEKi-sensitive cells (A549, H23, and H1944) were exposed to trametinib at their respective 1/2 IC<sub>50</sub> values for 6 h. Cell lysates were subjected to glutathione (GSH) and L-glutathione oxidized (GSSG) measurement using a commercial kit. Data of GSH/GSSG ratio represent the mean ± SEM of biological triplicates. \*\*\**P* < 0.001, by unpaired, two-sided Student's *t* test. (B) 3D plot showing ROS production. H460 and A549 cells were treated with trametinib for 6 h. The relative ROS production was calculated by setting the control group as 1. (C) Log<sub>2</sub> ratio values of fold change for *NQO1*, *GCLC*, *SOD1*, *GSTA4*, *GSTM4*, *SOD2*, and *HMOX1* transcripts in A549 and H460 cells before and after trametinib treatment. Cells were treated with trametinib at their respective 1/2 IC<sub>50</sub> values for 24 h. qPCR analysis was further conducted. (D) GSH/GSSG ratio in A549/TR and their parental cells. Data represent the mean ± SEM of biological triplicates. \*\*\**P* < 0.001, by unpaired, two-sided Student's *t* test. (E) ROS production of A549/TR and A549/P cells. (F) mRNA expression levels of *NQO1*, *GCLC*, *SOD1*, *GSTA4*, *GSTM4*, *SOD2*, and *HMOX1* in A549/TR and A549/P cells. Data represent the mean ± SEM of biological triplicates. \**P* < 0.05, \*\**P* < 0.01, and \*\*\**P* < 0.001; *ns*, not significant, by unpaired, two-sided Student's *t* test.

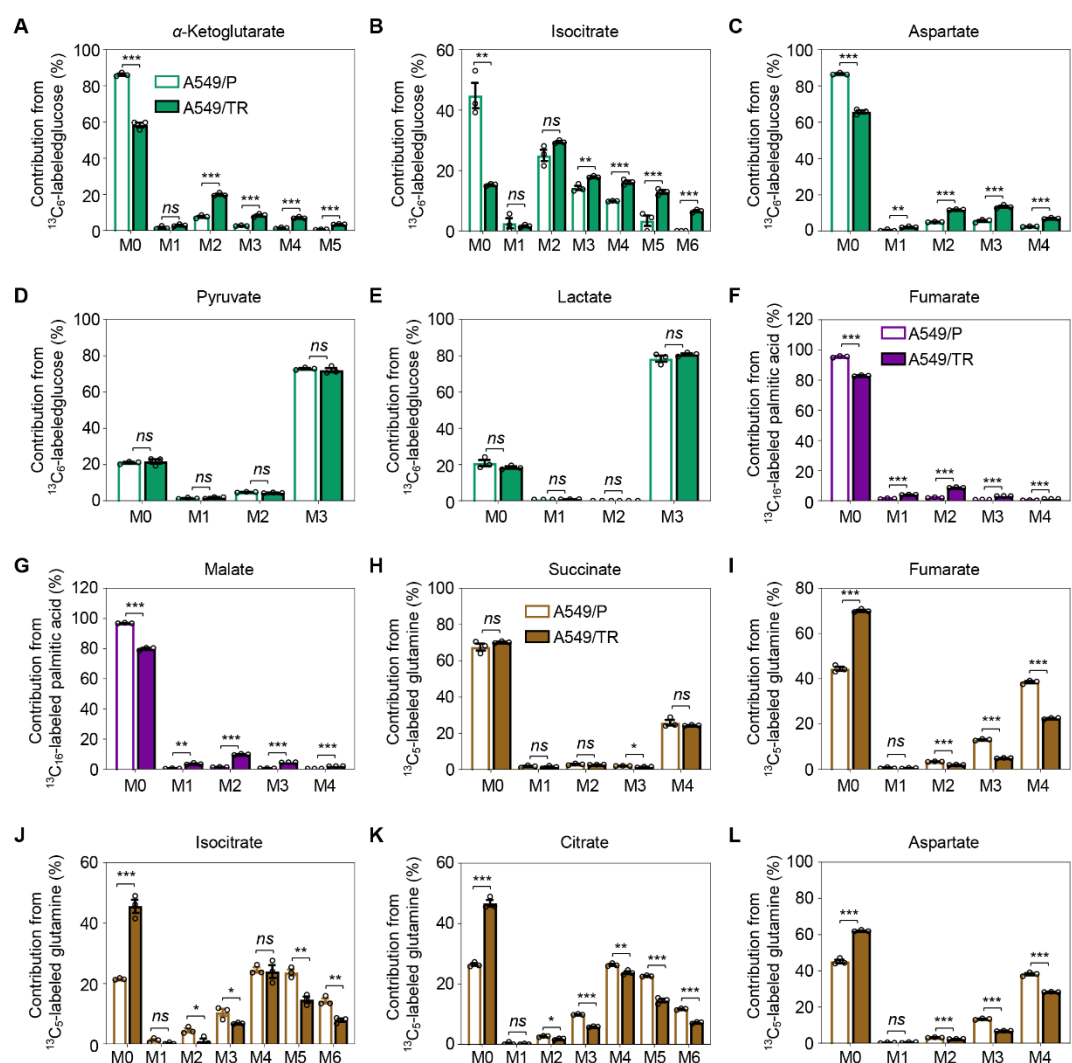

**Figure S4.** MEK inhibition favors enhanced carbon incorporation in TCA cycle metabolites. [ $\text{U-}^{13}\text{C}_6$ ]-glucose (green), [ $\text{U-}^{13}\text{C}_{16}$ ]-palmitate (purple) and [ $\text{U-}^{13}\text{C}_5$ ]-glutamine (brown) tracing experiments in A549/P and A549/TR cells. Cells were cultured in the presence of [ $\text{U-}^{13}\text{C}_6$ ]-glucose (12 h) (A–E), [ $\text{U-}^{13}\text{C}_{16}$ ]-palmitate (12 h) (F, G), or [ $\text{U-}^{13}\text{C}_5$ ]-glutamine (1 h) (H–L) prior to GC–MS analysis. The relative percentage of the isotopologues for each metabolite is shown. All data represent the mean  $\pm$  SEM of biological triplicates. \* $P < 0.05$ , \*\* $P < 0.01$ , and \*\*\* $P < 0.001$ ; ns, not significant, by unpaired, two-sided Student’s  $t$  test.

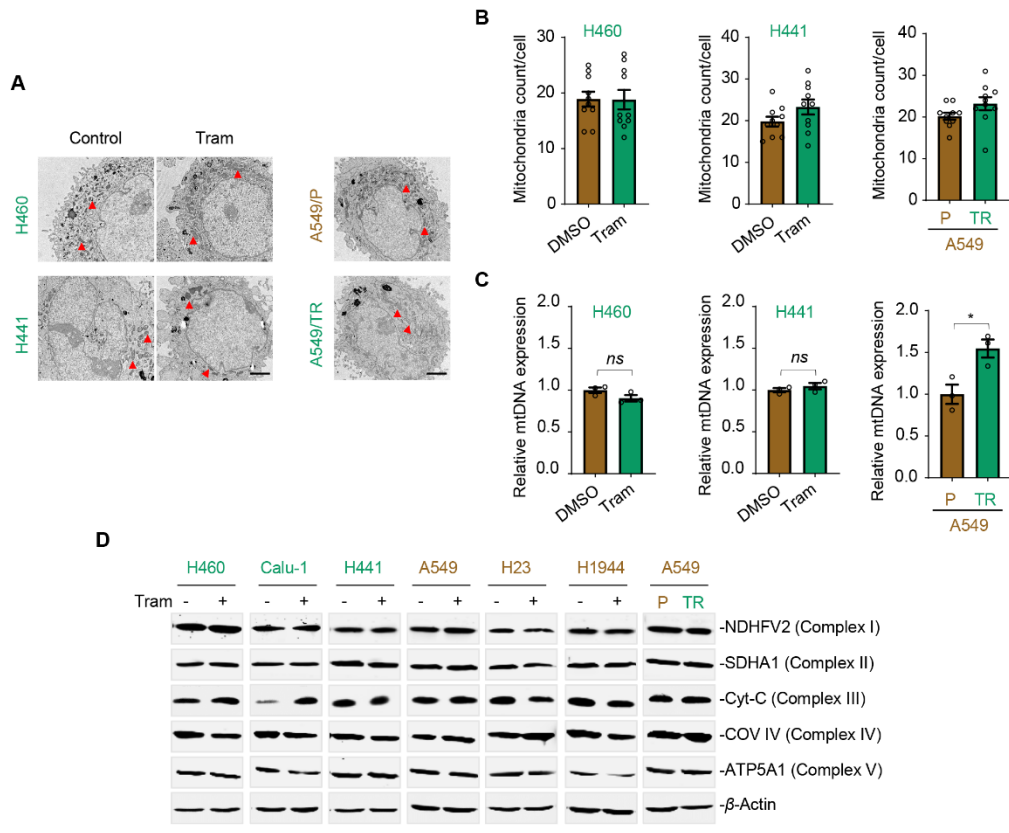

**Figure S5.** MEKi-resistance is not associated with mitochondrial function. (A) Mitochondria morphology of *KRAS*-mutant NSCLC cells. H460 and H441 cells were exposed to trametinib at their respective 1/2 IC<sub>50</sub> values for 24 h. Mitochondrial morphology was detected by a HT7700 transmission electron microscope. Representative images from each group are shown. Red arrowheads indicate swelling of mitochondria. Scale bar, 2 μm. (B) Average mitochondria number. Mitochondria in 10 cells was counted. Data are shown as means ± SEM of biological triplicates. (C) Mitochondrial DNA copy number. H460 and H441 cells were treated with trametinib at their respective 1/2 IC<sub>50</sub> values for 24 h. Nuclear and mitochondrial DNA content was measured using qPCR. Mitochondrial DNA content was determined by normalizing mitochondrial DNA abundance [tRNA-Leu (UUR)] to nuclear DNA (β2M) abundance. Data represent the mean ± SEM of biological triplicates. *ns*, not significant, by unpaired, two-sided Student's *t* test. (D) Effects of trametinib on electron transport chain complex components. Cells were treated with trametinib at their respective 1/2 IC<sub>50</sub> values for 24 h. Treated cells were collected and probed with antibodies against NDHCV2, SDHA1, Cyt-C, COV IV, and ATP5A1, respectively. Trametinib-resistant cell lines are marked in green, and trametinib-sensitive cell lines are marked in brown. Images are representative of three independent experiments with similar results.

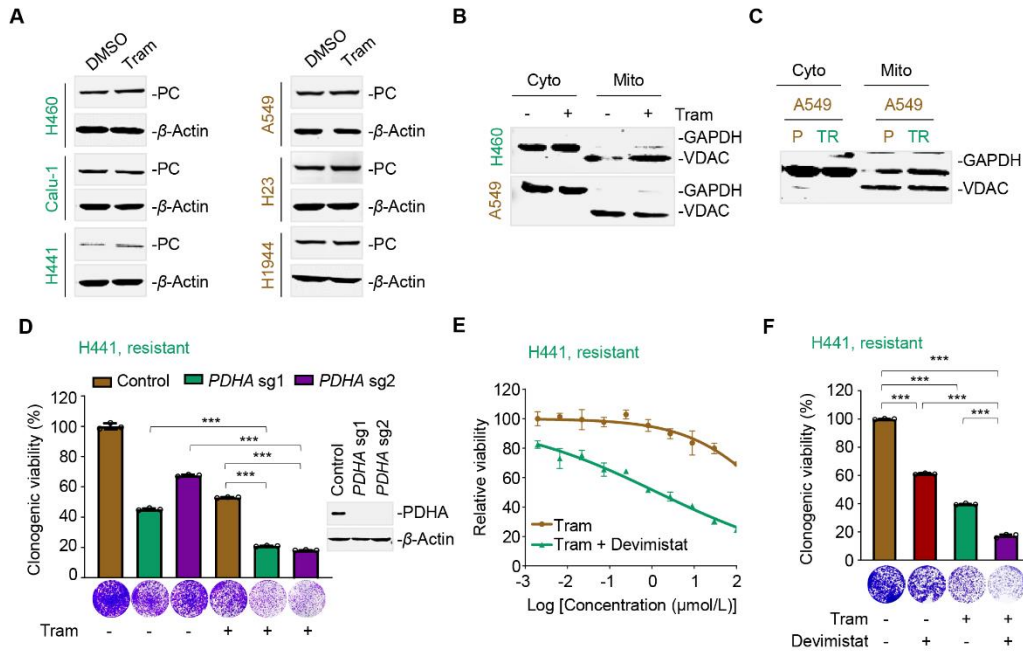

**Figure S6.** Intervention of PDHc sensitizes resistant cells to trametinib. (A) Pyruvate carboxylase (PC) protein levels. Cells were treated with trametinib at their respective 1/2 IC<sub>50</sub> values for 24 h. PC expression was detected by immunoblot analysis. MEKi-resistant cell lines are marked in green and MEKi-sensitive cell lines are marked in brown. (B) Mitochondria fraction. H460 and A549 cells were exposed to trametinib for 24 h. Mitochondria was isolated by a mitochondria isolation kit. GAPDH and VDAC served as the cytoplasmic and mitochondrial fraction markers. (C) Mitochondria fraction in A549/P and A549/TR cells. (D) *PDHA* knockout synergized with trametinib in H441 cells. *Left*, relative viability of the culture colonies; *right*, *PDHA* knockout efficiency in H441 cells by immunoblot analysis. Data are shown as the mean ± SEM of biological triplicates. \*\*\**P* < 0.001, by one-way ANOVA with Tukey's multiple-comparisons test. (E, F) PDHc inhibition by devimistat re-sensitized the inhibitory effects of trametinib on H441 cells. Growth curves (E) and the relative viability of cultured colonies (F) are shown. Data are shown as the mean ± SEM of biological triplicates. \*\*\**P* < 0.001, by one-way ANOVA with Tukey's multiple-comparisons test.



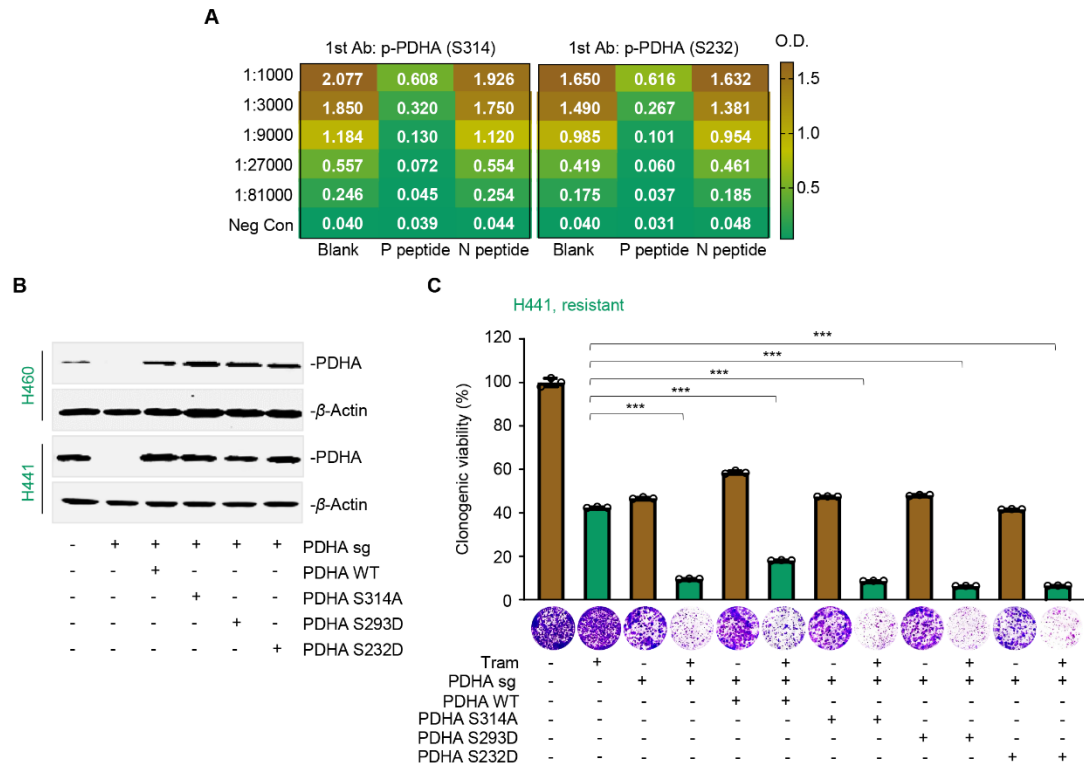

**Figure S7.** PDHA phosphorylation maintains PDHc activity. (A) Enzyme-linked immunosorbent assays. Series diluted p-PDHA (S314) and p-PDHA (S232) antibodies were used to detect P peptide and N peptide. P peptide, phospho-peptide; N peptide, non-phospho-peptide. (B) *PDHA* knockout and reconstitution of PDHA WT, PDHA S314A, PDHA S293D, and PDHA S232D in H460 and H441 cells. PDHA protein abundance was detected by immunoblot analysis. (C) Colony formation assays. H441 cells were depleted of endogenous PDHA, followed by reconstitution of PDH WT, PDH S314A, PDH S293D, and PDH S232D. Transfected H441 cells were then treated with or without trametinib for 7–10 days. Clonogenic assays were carried out. Data are presented as the mean  $\pm$  SEM of three independent experiments. \*\*\*  $P < 0.001$ , by unpaired, two-sided Student's *t* test.

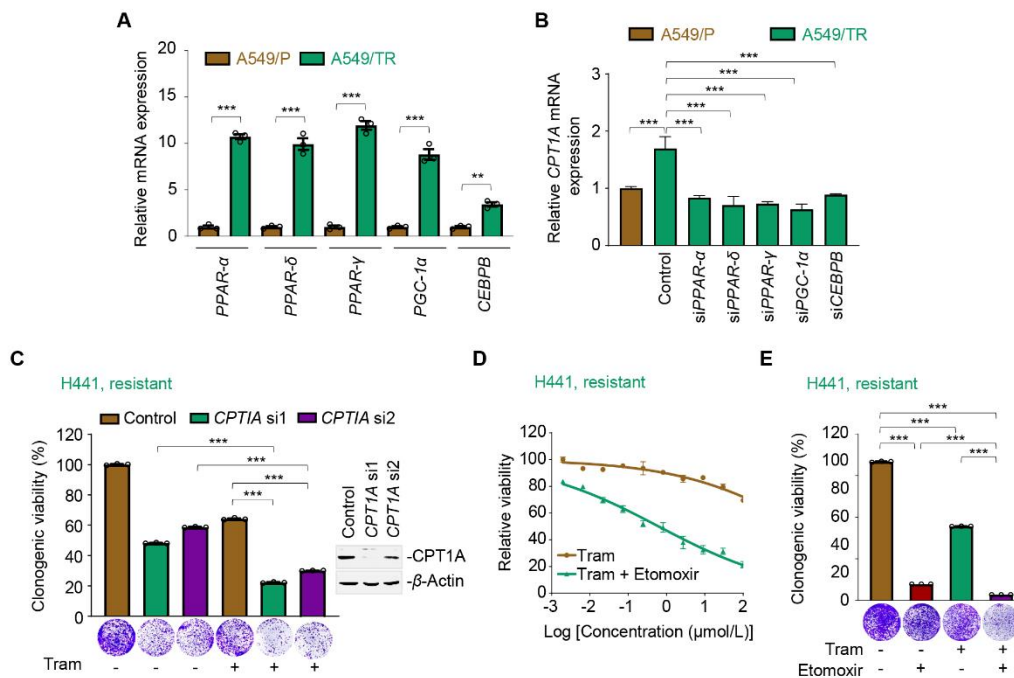

**Figure S8.** CPT1A is required for the therapeutic efficacy of trametinib. (A) Relative mRNA expression levels of *PPAR $\alpha$* , *PPAR $\delta$* , *PPAR $\gamma$* , *PGC-1 $\alpha$* , and *CEBPB* in A549/TR cells and their parental cells. Data represent the mean  $\pm$  SEM of biological triplicates.  $**P < 0.01$ , and  $***P < 0.001$ , by unpaired, two-sided Student's *t* test. (B) CPT1A expression in A549/TR cells after *PPARs*, *PGC-1 $\alpha$* , or *CEBPB* genetical silencing. (C) *CPT1A* silencing increased the sensitivity of H441 to trametinib. *Left*, relative viability of the cultured colonies; *right*, efficacy of *CPT1A* knockdown by immunoblot analysis. Data represent the mean  $\pm$  SEM of biological triplicates.  $***P < 0.001$ , by one-way ANOVA with Tukey's multiple-comparisons test. (D, E) Etomoxir enhanced the killing efficacy of trametinib in H441 cells. Growth curves (D) and the relative viability of cultured colonies (E) are shown. Data represent the mean  $\pm$  SEM of biological triplicates.  $***P < 0.001$ , by one-way ANOVA with Tukey's multiple-comparisons test.

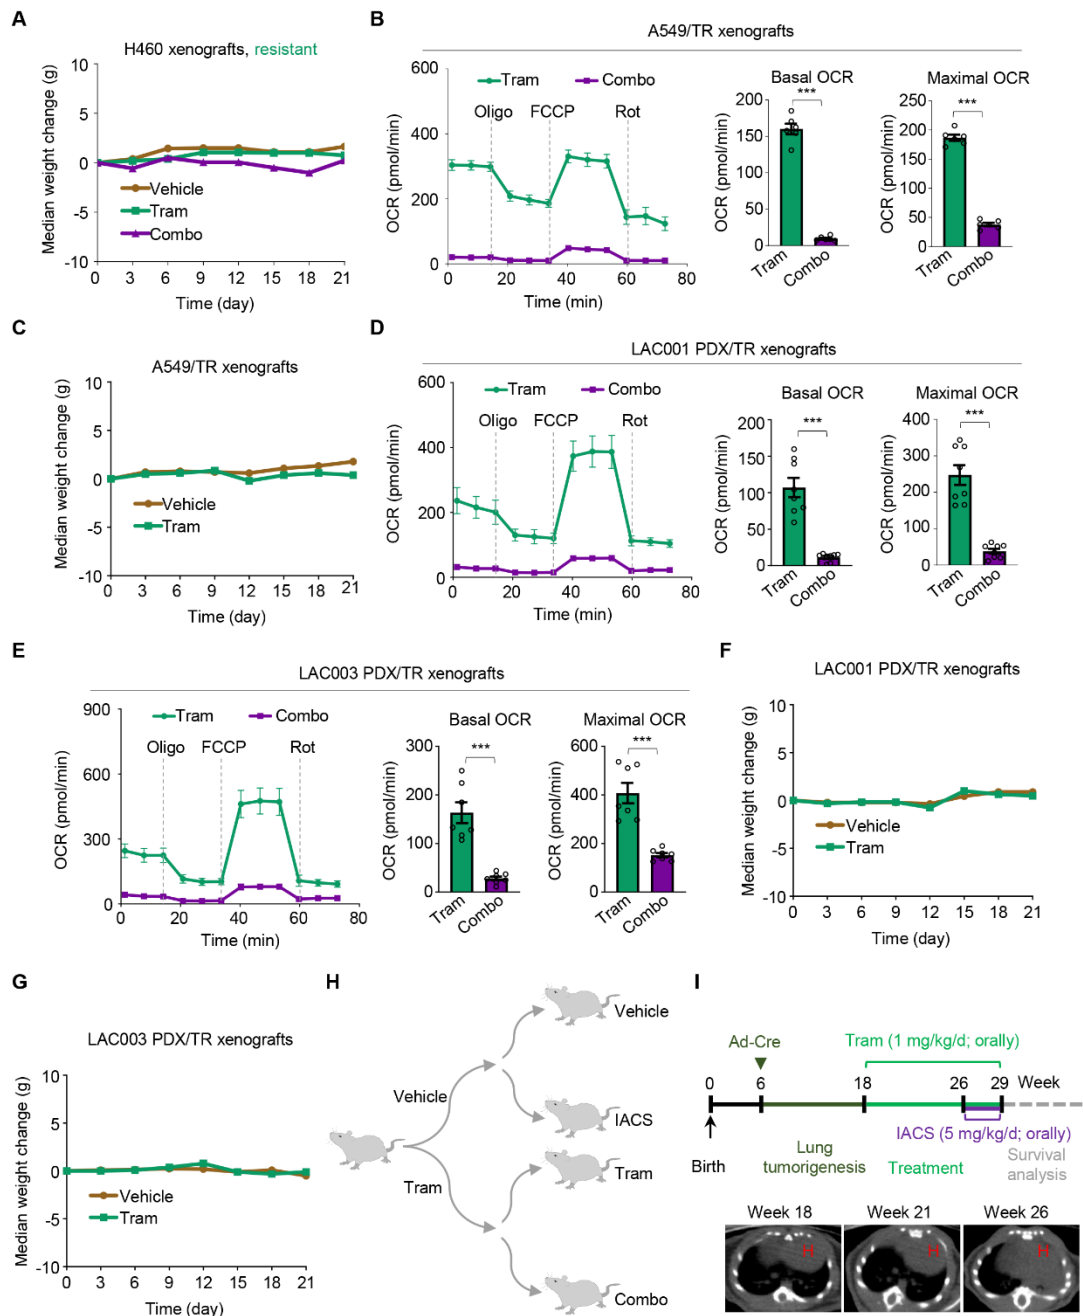

**Figure S9.** *In vivo* efficacy of trametinib and IACS-010759 combination. (A) The mouse body weight on Day 21 ( $n = 6$  per group). Data represent the mean  $\pm$  SEM. (B) OCR levels in combo-treated and trametinib-treated A549/TR xenograft tumors. The representative trace of OCR values from a mitochondrial stress test is shown (*left*). Basal OCR and maximal OCR were interpolated from the time course plot (*right*). Values are expressed as the mean  $\pm$  SEM of three independent biological samples. \*\*\* $P < 0.001$ , by unpaired, two-sided Student's  $t$  test. (C) The mouse body weight on day 21 ( $n = 6$  per group). Data are presented as the mean  $\pm$  SEM. (D, E) OCR levels in

combo-treated and trametinib-treated LAC001 and LAC003 PDX/TR xenograft tumors. A representative trace of OCR values from a mitochondrial stress test is shown (*left*). Basal OCR and maximal OCR were interpolated from the time course plot (*right*). Values are expressed as the mean  $\pm$  SEM of three independent biological samples. \*\*\* $P < 0.001$ , by unpaired, two-sided Student's  $t$  test. (F, G) Mouse body weight of LAC001 (F;  $n = 8$  per group) and LAC003 PDX/TR bearing mice (G;  $n = 7$  per group). Values are the mean  $\pm$  SEM. (H) Treatment scheme. (I) schematic diagram showing the generation of LSL-*Kras*<sup>G12D/+</sup>; *Trp53*<sup>fl/fl</sup> mouse model (KP) with trametinib-resistant tumors. H, heart.

## 2. Supporting tables

**Table S1** KRAS mutant status of the cell lines employed.

| Histology            | Cell lines | KRAS mutation | Medium   | RRID      |
|----------------------|------------|---------------|----------|-----------|
| Lung, adenocarcinoma | H460       | Q61H          | RMPI1640 | CVCL_0459 |
|                      | Calu-1     | G12C          | DMEM     | CVCL_0608 |
|                      | H441       | G12V          | RMPI1640 | CVCL_1561 |
|                      | H292       | G12S          | RMPI1640 | CVCL_0455 |
|                      | A549       | G12S          | RMPI1640 | CVCL_0023 |
|                      | H23        | G12C          | RMPI1640 | CVCL_1547 |
|                      | H1944      | G13D          | RMPI1640 | CVCL_1508 |
|                      | H358       | G12C          | RMPI1640 | CVCL_1559 |

**Table S2** Primers for RT-qPCR assays.

| RT-qPCR primer sequences           |                           |  |
|------------------------------------|---------------------------|--|
| Primer labels                      | Sequences                 |  |
| <i>CPT1A</i> #F                    | TGCCCTGAGACGGGGATTAT      |  |
| <i>CPT1A</i> #R                    | TTTCCAGCCCAGCACATGAA      |  |
| <i>NQO1</i> #F                     | CAGCTCACCGAGAGCCTAGT      |  |
| <i>NQO1</i> #R                     | GAGTGAGCCAGTACGATCAGTG    |  |
| <i>GCLC</i> #F                     | ATGCCATGGGATTTGGAAT       |  |
| <i>GCLC</i> #R                     | AGATATACTGCAGGCTTGGAAATG  |  |
| <i>SOD1</i> #F                     | TCATCAATTTTCGAGCAGAAGG    |  |
| <i>SOD1</i> #R                     | CAGGCCTTCAGTCAGTCCTTT     |  |
| <i>GSTA4</i> #F                    | AGTTGTACAAGTTGCAGGATGG    |  |
| <i>GSTA4</i> #R                    | CAATTTCAACCATGGGCACT      |  |
| <i>GSTM4</i> #F                    | TCATCTCCCGCTTTGAGG        |  |
| <i>GSTM4</i> #R                    | CAGACAGCCACCCTTGTGTA      |  |
| <i>SOD2</i> #F                     | CTGGACAAAACCTCAGCCCTA     |  |
| <i>SOD2</i> #R                     | TGATGGCTTCCAGCAACTC       |  |
| <i>HMOX1</i> #F                    | GGGTGATAGAAGAGGCCAAGA     |  |
| <i>HMOX1</i> #R                    | AGCTCCTGCAACTCCTCAAA      |  |
| <i>PPAR<math>\alpha</math></i> #F  | GAAGCTGTCACCACAGTAGC      |  |
| <i>PPAR<math>\alpha</math></i> #R  | TTCCAGAACTATCCTCGCCG      |  |
| <i>PPAR<math>\delta</math></i> #F  | AGTGTTGTACAGTGTTTTGGGC    |  |
| <i>PPAR<math>\delta</math></i> #R  | AGACCATTCCAGACCCTCGT      |  |
| <i>PPAR<math>\gamma</math></i> #F  | GTGACCAGAAGCCTGCATTT      |  |
| <i>PPAR<math>\gamma</math></i> #R  | GTCAACCATGGTCATTTCTGTT    |  |
| <i>PGC-1<math>\alpha</math></i> #F | GTAAATCTGCGGGATGATGG      |  |
| <i>PGC-1<math>\alpha</math></i> #R | AATTGCTTGCCTCCACAAA       |  |
| <i>CEBPB</i> #F                    | AGAGGCGTCTGTATATTTTGGG    |  |
| <i>CEBPB</i> #R                    | TGCCCCAAAAGGCTTTGTAA      |  |
| <i><math>\beta</math>2m</i> #F     | TGCTGTCTCCATGTTTGATGTATCT |  |
| <i><math>\beta</math>2m</i> #R     | TCTCTGCTCCCCACCTCTAAGT    |  |
| <i>tRNA-Leu(UUR)</i> #F            | CACCCAAGAACAGGGTTTGT      |  |
| <i>tRNA-Leu(UUR)</i> #R            | TGGCCATGGGTATGTTGTTA      |  |
| <i><math>\beta</math>-Actin</i> #F | GGGACCTGACTGACTACCTC      |  |
| <i><math>\beta</math>-Actin</i> #R | ATCTTCATTGTGCTGGGTG       |  |

  

| siRNA sequences        |                       |  |
|------------------------|-----------------------|--|
| Target genes           | Sequences             |  |
| human <i>CPT1A</i> si1 | AGAAGUUCAUCAGAUUCAAGA |  |
| human <i>CPT1A</i> si2 | UUGUCUAAGAGCUUCAUGGCU |  |

  

| CRISPR gRNA sequences |                      |                 |
|-----------------------|----------------------|-----------------|
| Target genes          | Sequences            | Target location |
| human <i>PDHA</i> sg1 | AGAAGCGCCAGACAGCACGC | exon 1          |
| human <i>PDHA</i> sg2 | GGCCTTCTCCAGCCGGTGA  | exon 3          |

**Table S3** Antibodies used for immunoblotting and immunoprecipitation.

| Protein target | Company           | Catalog Number | Dilution | RRID        |
|----------------|-------------------|----------------|----------|-------------|
| PDHA           | Abcam             | ab110330       | 1:1000   | AB_10858459 |
| p-PDHA S293    | Abcam             | ab177461       | 1:1000   | AB_2756339  |
| NDUFV2         | Abcam             | ab96117        | 1:1000   | AB_10678713 |
| ATP5A1         | Abclonal          | A5884          | 1:1000   | AB_2766632  |
| PDHK1          | Abclonal          | A0834          | 1:1000   | AB_2757420  |
| PDP2           | Abclonal          | A14416         | 1:1000   | AB_2761285  |
| CPTIA          | Abclonal          | A5307          | 1:1000   | AB_2766119  |
| COX IV         | CST               | #4850          | 1:1000   | AB_2085424  |
| Cyt-C          | CST               | #11940         | 1:1000   | AB_2637071  |
| SDHA1          | CST               | #11998         | 1:1000   | AB_2750900  |
| VDAC           | CST               | #4866          | 1:1000   | AB_2272627  |
| GAPDH          | CST               | #5174          | 1:10000  | AB_10622025 |
| $\beta$ -Actin | Abways Technology | AB0035         | 1:10000  | AB_2904142  |
| p-PDHA S232    | Shanghai Genomics | /              | 1:1000   | /           |
| p-PDHA S314    | Shanghai Genomics | /              | 1:1000   | /           |

**Table S4** Metabolomic and transcriptomic analysis of enriched metabolic pathways after trametinib treatment.

| Metabolomics pathway enrichment in H460 cells after trametinib treatment |             |      |              |                |      |              |
|--------------------------------------------------------------------------|-------------|------|--------------|----------------|------|--------------|
| Pathway                                                                  | Metabolomic |      |              | Transcriptomic |      |              |
|                                                                          | Total       | Hits | Raw <i>p</i> | Total          | Hits | Raw <i>p</i> |
| Oxidative phosphorylation                                                | 5           | 4    | 0.005568     | 123            | 35   | 0.999136     |
| Alanine, aspartate and glutamate metabolism                              | 4           | 4    | 0.022406     | 32             | 14   | 0.466658     |
| Glycerophospholipid metabolism                                           | 4           | 4    | 0.022406     | 82             | 31   | 0.788956     |
| Pantothenate and CoA biosynthesis                                        | 4           | 4    | 0.022406     | 15             | 3    | 0.979559     |
| Arginine and proline metabolism                                          | 4           | 4    | 0.025211     | 46             | 21   | 0.336001     |
| Vitamin digestion and absorption                                         | 4           | 3    | 0.025211     | 19             | 10   | 0.225627     |
| Thiamine metabolism                                                      | 4           | 3    | 0.039167     | 14             | 5    | 0.75939      |
| Calcium signaling pathway                                                | 2           | 2    | 0.039167     | 152            | 47   | 0.997589     |
| AMPK signaling pathway                                                   | 2           | 2    | 0.039167     | 108            | 41   | 0.805057     |
| Longevity regulating pathway                                             | 2           | 2    | 0.039167     | 76             | 32   | 0.504464     |
| cAMP signaling pathway                                                   | 2           | 2    | 0.058987     | 165            | 65   | 0.741086     |
| Nicotinate and nicotinamide metabolism                                   | 2           | 2    | 0.094903     | 27             | 11   | 0.606327     |
| Ascorbate and aldarate metabolism                                        | 3           | 3    | 0.102965     | 10             | 3    | 0.856593     |
| Glutathione metabolism                                                   | 6           | 3    | 0.102965     | 46             | 28   | 0.006217     |
| Aldosterone synthesis and secretion                                      | 3           | 2    | 0.144213     | 83             | 31   | 0.813876     |
| Galactose metabolism                                                     | 3           | 2    | 0.153366     | 26             | 11   | 0.543365     |
| Glyoxylate and dicarboxylate metabolism                                  | 7           | 5    | 0.153366     | 25             | 15   | 0.048194     |
| Nitrogen metabolism                                                      | 7           | 3    | 0.153366     | 14             | 4    | 0.89827      |
| Sphingolipid signaling pathway                                           | 2           | 2    | 0.153366     | 111            | 47   | 0.468225     |
| Thyroid hormone synthesis                                                | 2           | 2    | 0.153366     | 60             | 23   | 0.73711      |
| Choline metabolism in cancer                                             | 2           | 2    | 0.153366     | 91             | 45   | 0.076337     |
| Aminoacyl-tRNA biosynthesis                                              | 9           | 6    | 0.153664     | 41             | 19   | 0.31831      |
| Cysteine and methionine metabolism                                       | 10          | 6    | 0.190938     | 44             | 24   | 0.055433     |
| Mannose type O-glycan biosynthesis                                       | 1           | 1    | 0.20202      | 23             | 7    | 0.90446      |
| Sphingolipid metabolism                                                  | 1           | 1    | 0.20202      | 42             | 19   | 0.367927     |
| HIF-1 signaling pathway                                                  | 1           | 1    | 0.20202      | 92             | 38   | 0.55895      |
| Phosphatidylinositol signaling system                                    | 1           | 1    | 0.20202      | 90             | 34   | 0.798703     |
| Pancreatic secretion                                                     | 1           | 1    | 0.20202      | 69             | 27   | 0.700977     |
| Neuroactive ligand-receptor interaction                                  | 6           | 1    | 0.211427     | 171            | 40   | 1            |
| Ferroptosis                                                              | 4           | 3    | 0.299625     | 39             | 25   | 0.003636     |
| Central carbon metabolism in cancer                                      | 4           | 3    | 0.299625     | 57             | 24   | 0.516538     |
| Protein digestion and absorption                                         | 9           | 5    | 0.315681     | 70             | 30   | 0.45684      |
| Tryptophan metabolism                                                    | 2           | 1    | 0.364873     | 33             | 13   | 0.662619     |
| Inositol phosphate metabolism                                            | 2           | 1    | 0.364873     | 67             | 26   | 0.718183     |
| Propanoate metabolism                                                    | 2           | 1    | 0.364873     | 31             | 14   | 0.406732     |
| Butanoate metabolism                                                     | 2           | 1    | 0.364873     | 21             | 9    | 0.534558     |

|                                              |    |   |          |     |     |          |
|----------------------------------------------|----|---|----------|-----|-----|----------|
| Retrograde endocannabinoid signaling         | 2  | 1 | 0.364873 | 123 | 37  | 0.996978 |
| Oxytocin signaling pathway                   | 2  | 1 | 0.364873 | 135 | 50  | 0.878215 |
| Salivary secretion                           | 2  | 1 | 0.364873 | 64  | 26  | 0.606837 |
| Arginine biosynthesis                        | 5  | 3 | 0.381913 | 19  | 5   | 0.946929 |
| beta-Alanine metabolism                      | 5  | 3 | 0.381913 | 27  | 12  | 0.451784 |
| Arachidonic acid metabolism                  | 5  | 3 | 0.381913 | 42  | 15  | 0.822612 |
| Mineral absorption                           | 5  | 3 | 0.381913 | 40  | 20  | 0.176516 |
| Glycolysis/Gluconeogenesis                   | 1  | 1 | 0.393939 | 57  | 25  | 0.409865 |
| Folate biosynthesis                          | 1  | 1 | 0.393939 | 23  | 10  | 0.504569 |
| Terpenoid backbone biosynthesis              | 5  | 1 | 0.393939 | 21  | 12  | 0.109851 |
| Metabolism of xenobiotics by cytochrome P450 | 1  | 1 | 0.393939 | 42  | 15  | 0.822612 |
| FoxO signaling pathway                       | 1  | 1 | 0.393939 | 120 | 59  | 0.053518 |
| mTOR signaling pathway                       | 1  | 1 | 0.393939 | 137 | 65  | 0.092242 |
| PI3K-Akt signaling pathway                   | 1  | 1 | 0.393939 | 292 | 130 | 0.159347 |
| Synaptic vesicle cycle                       | 1  | 1 | 0.393939 | 50  | 20  | 0.640369 |
| Glutamatergic synapse                        | 1  | 1 | 0.393939 | 95  | 29  | 0.990295 |
| Cholinergic synapse                          | 1  | 1 | 0.393939 | 98  | 26  | 0.999371 |
| GABAergic synapse                            | 1  | 1 | 0.393939 | 69  | 23  | 0.936639 |
| Regulation of actin cytoskeleton             | 1  | 1 | 0.393939 | 188 | 94  | 0.010646 |
| Insulin secretion                            | 1  | 1 | 0.393939 | 69  | 23  | 0.936639 |
| Glucagon signaling pathway                   | 1  | 1 | 0.393939 | 91  | 33  | 0.872859 |
| Proximal tubule bicarbonate reclamation      | 1  | 1 | 0.393939 | 21  | 7   | 0.838007 |
| Gastric acid secretion                       | 1  | 1 | 0.393939 | 59  | 3   | 0.701431 |
| Carbohydrate digestion and absorption        | 1  | 1 | 0.393939 | 29  | 8   | 0.960041 |
| Morphine addiction                           | 1  | 1 | 0.393939 | 69  | 30  | 0.416467 |
| Nicotine addiction                           | 1  | 1 | 0.393939 | 26  | 4   | 0.999054 |
| African trypanosomiasis                      | 1  | 1 | 0.393939 | 26  | 11  | 0.543365 |
| Tyrosine metabolism                          | 3  | 1 | 0.495827 | 25  | 6   | 0.979693 |
| Phenylalanine metabolism                     | 3  | 1 | 0.495827 | 14  | 3   | 0.969203 |
| Starch and sucrose metabolism                | 3  | 1 | 0.495827 | 25  | 11  | 0.477084 |
| Bile secretion                               | 12 | 6 | 0.538554 | 51  | 24  | 0.253498 |
| Carbon metabolism                            | 3  | 2 | 0.561416 | 105 | 57  | 0.005324 |
| Taste transduction                           | 3  | 2 | 0.561416 | 41  | 11  | 0.983222 |
| Regulation of lipolysis in adipocytes        | 3  | 2 | 0.561416 | 45  | 16  | 0.833957 |
| Renin secretion                              | 3  | 2 | 0.561416 | 55  | 25  | 0.323127 |
| ABC transporters                             | 6  | 2 | 0.597734 | 38  | 16  | 0.534104 |
| Histidine metabolism                         | 4  | 2 | 0.646413 | 20  | 9   | 0.460498 |
| cGMP-PKG signaling pathway                   | 4  | 2 | 0.646413 | 143 | 52  | 0.913714 |
| Serotonergic synapse                         | 4  | 2 | 0.646413 | 86  | 24  | 0.997057 |
| Pyrimidine metabolism                        | 6  | 3 | 0.679687 | 98  | 59  | 0.000134 |
| Glycine, serine and threonine metabolism     | 6  | 3 | 0.679687 | 35  | 13  | 0.75691  |
| Primary bile acid biosynthesis               | 4  | 1 | 1        | 12  | 5   | 0.605212 |
| Pentose phosphate pathway                    | 2  | 1 | 1        | 27  | 12  | 0.451784 |
| Fructose and mannose metabolism              | 2  | 1 | 1        | 32  | 11  | 0.84266  |
| Purine metabolism                            | 14 | 6 | 1        | 159 | 83  | 0.003858 |
| Linoleic acid metabolism                     | 2  | 1 | 1        | 16  | 2   | 0.997726 |
| Porphyryn and chlorophyll metabolism         | 2  | 1 | 1        | 25  | 12  | 0.322487 |
| Drug metabolism-cytochrome P450              | 2  | 1 | 1        | 37  | 11  | 0.950895 |
| Vascular smooth muscle contraction           | 2  | 1 | 1        | 99  | 35  | 0.914654 |
| Alcoholism                                   | 2  | 1 | 1        | 148 | 47  | 0.994854 |

**Table S5** Biochemistry testing of plasma from MEKi-resistant xenograft mice.

| H460 xenograft mouse model       |         |                  |                                         |
|----------------------------------|---------|------------------|-----------------------------------------|
| Item                             | Group   | Value            | <i>P</i> -value (Treatment vs. Vehicle) |
| CR ( $\mu\text{mol/L}$ )         | Vehicle | 15.6 $\pm$ 2.9   |                                         |
|                                  | Tram    | 11.8 $\pm$ 1.1   | 0.2616                                  |
|                                  | Combo   | 10.6 $\pm$ 1.6   | 0.1722                                  |
| BUN (mmol/L)                     | Vehicle | 8.2 $\pm$ 0.7    |                                         |
|                                  | Tram    | 7.2 $\pm$ 0.3    | 0.1913                                  |
|                                  | Combo   | 11.0 $\pm$ 0.6   | 0.0118                                  |
| AST (U/L)                        | Vehicle | 197.6 $\pm$ 32.7 |                                         |
|                                  | Tram    | 196.0 $\pm$ 19.5 | 0.9675                                  |
|                                  | Combo   | 247.0 $\pm$ 15.0 | 0.2069                                  |
| ALT (U/L)                        | Vehicle | 32.0 $\pm$ 3.6   |                                         |
|                                  | Tram    | 32.4 $\pm$ 2.4   | 0.9294                                  |
|                                  | Combo   | 35.0 $\pm$ 5.8   | 0.5215                                  |
| AST/ALT                          | Vehicle | 6.3 $\pm$ 0.9    |                                         |
|                                  | Tram    | 6.1 $\pm$ 0.4    | 0.8101                                  |
|                                  | Combo   | 7.1 $\pm$ 0.5    | 0.4321                                  |
| A549/TR xenograft mouse model    |         |                  |                                         |
| Item                             | Group   | Value            | <i>P</i> -value (Treatment vs. Vehicle) |
| CR ( $\mu\text{mol/L}$ )         | Tram    | 15.4 $\pm$ 0.7   |                                         |
|                                  | Combo   | 17.2 $\pm$ 1.3   | 0.2693                                  |
| BUN (mmol/L)                     | Tram    | 8.3 $\pm$ 0.6    |                                         |
|                                  | Combo   | 12.4 $\pm$ 0.6   | 0.0273                                  |
| AST (U/L)                        | Tram    | 225.0 $\pm$ 16.2 |                                         |
|                                  | Combo   | 198.8 $\pm$ 16.6 | 0.2918                                  |
| ALT (U/L)                        | Tram    | 60.8 $\pm$ 5.5   |                                         |
|                                  | Combo   | 50.2 $\pm$ 3.2   | 0.1351                                  |
| AST/ALT                          | Tram    | 3.7 $\pm$ 0.2    |                                         |
|                                  | Combo   | 4.1 $\pm$ 0.5    | 0.5570                                  |
| LAC PDX/TR xenograft mouse model |         |                  |                                         |
| Item                             | Group   | Value            | <i>P</i> -value (Treatment vs. Vehicle) |
| CR ( $\mu\text{mol/L}$ )         | Tram    | 27.4 $\pm$ 8.8   |                                         |
|                                  | Combo   | 20.4 $\pm$ 4.2   | 0.4936                                  |
| BUN (mmol/L)                     | Tram    | 10.3 $\pm$ 0.5   |                                         |
|                                  | Combo   | 10.8 $\pm$ 0.6   | 0.0170                                  |
| AST (U/L)                        | Tram    | 178.6 $\pm$ 11.3 |                                         |
|                                  | Combo   | 227.4 $\pm$ 27.4 | 0.1379                                  |
| ALT (U/L)                        | Tram    | 32.8 $\pm$ 4.0   |                                         |
|                                  | Combo   | 37.2 $\pm$ 1.7   | 0.3360                                  |
| AST/ALT                          | Tram    | 5.8 $\pm$ 0.9    |                                         |
|                                  | Combo   | 6.2 $\pm$ 0.9    | 0.7698                                  |
